# Supplementary material for: Aero Grade Epoxy Vitrimer towards Commercialization
Source: MDPI journal article supplement (doi:10.3390/polym14153180), 2022-08-04
Supplement: s1 [file s1]

## Supplementary Materials

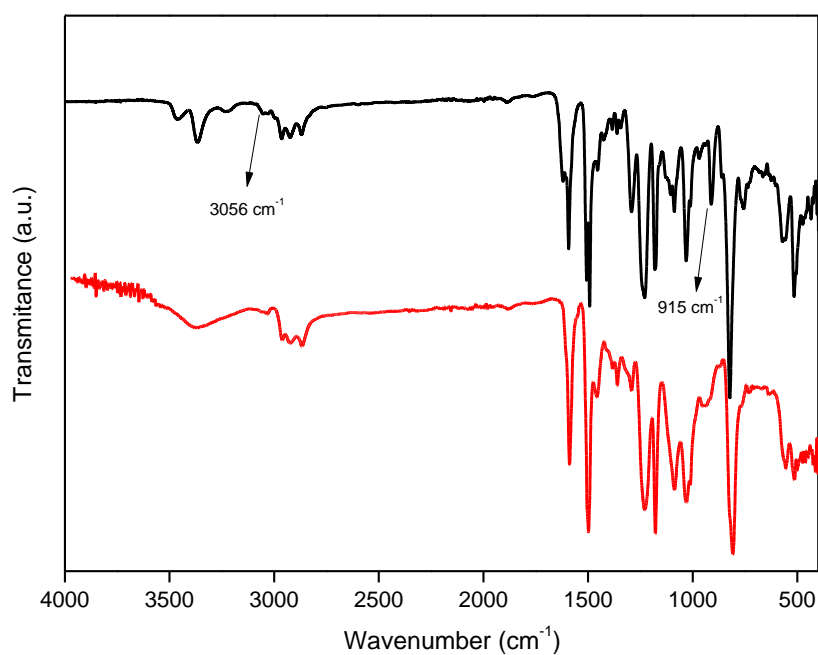

**Figure S1.** FTIR of uncured (black) and cured aero grade epoxy resin (red).

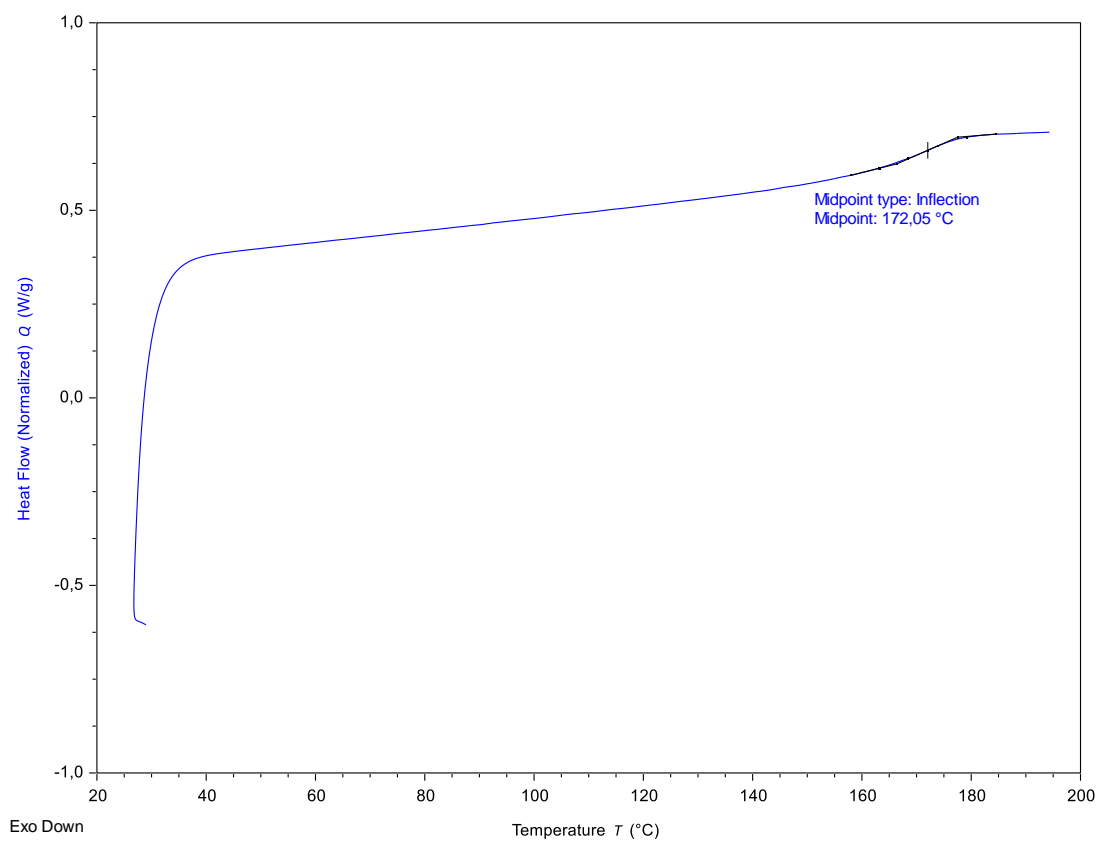

**Figure S2.** DSC thermogram for aero grade epoxy vitrimer, from where a  $T_g$  value of 172  $^{\circ}\text{C}$  was determined.

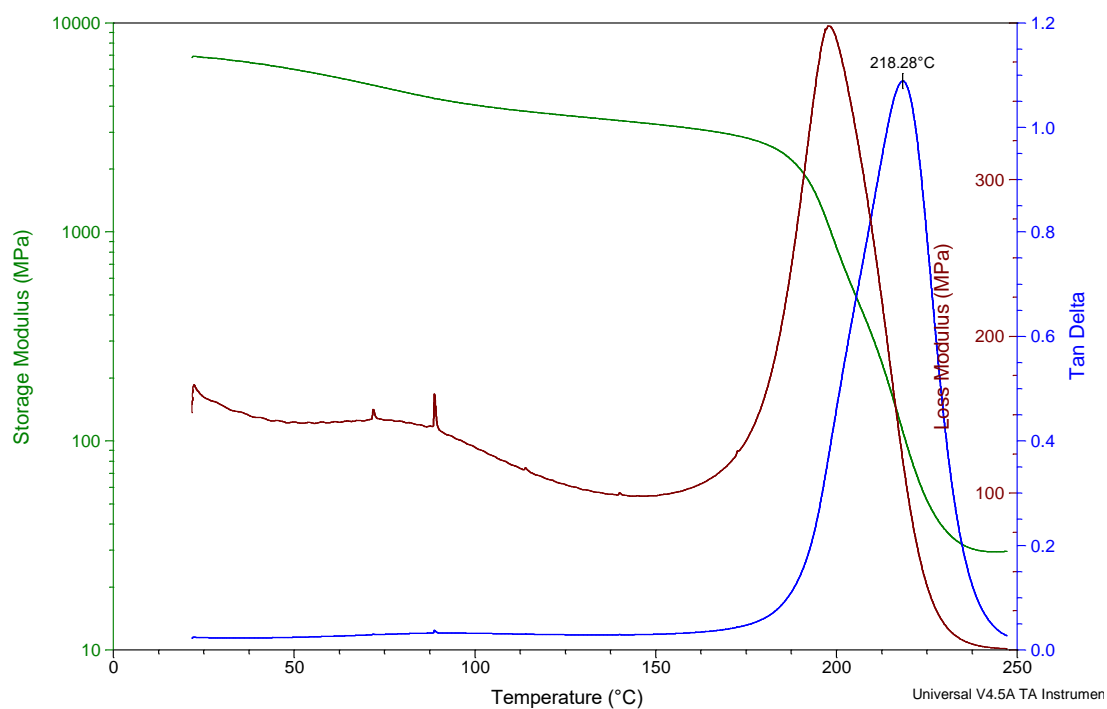

**Figure S3.** DMA curve obtained for RTM6, representing storage modulus, loss modulus and tan delta versus temperature. T<sub>g</sub> = 218 °C was determined from the maximum of tan delta.

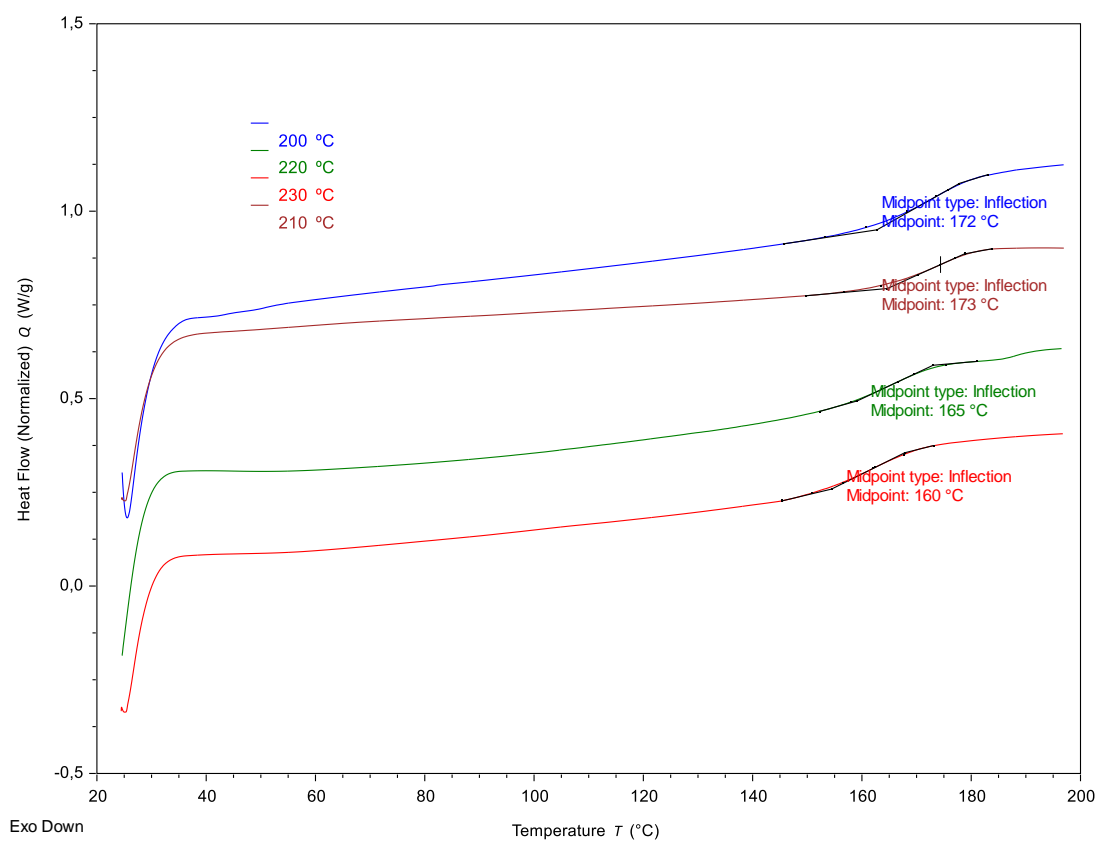

**Figure S4.** DSC thermograms of aero grade epoxy vitrimer after aging 20 min in air atmosphere at 200 °C, 210 °C, 220 °C and 230 °C.

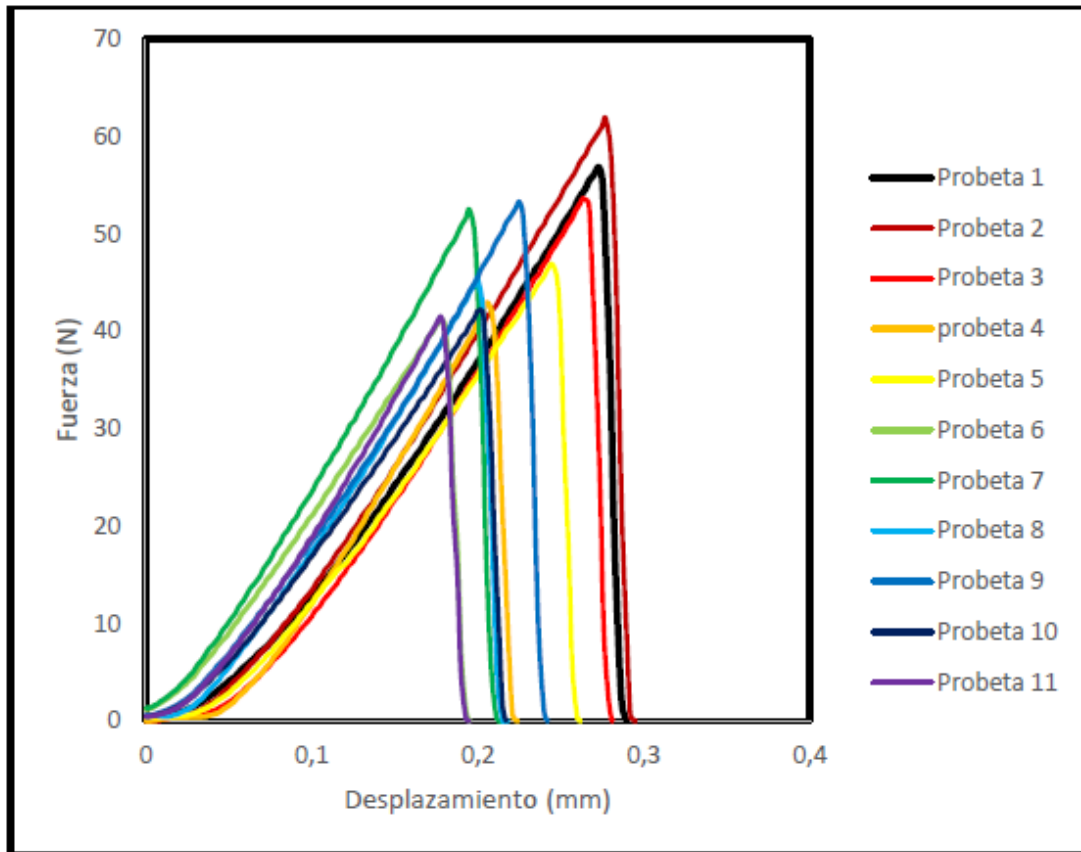

**Figure S5.** Force-displacement graphs of epoxy vitrimer.

**Table S1.** Values of the stress intensity factor  $K_Q$  for all tested materials.

| Specimen | $K_Q$<br>(MPa.m <sup>1/2</sup> ) |
|----------|----------------------------------|
| 1        | 1.05                             |
| 2        | 1.10                             |
| 3        | 1.05                             |
| 4        | 1.04                             |
| 5        | 1.05                             |
| 6        | 1.00                             |
| 7        | 1.00                             |
| 8        | 0.94                             |
| 9        | 1.11                             |
| 10       | 0.85                             |
| 11       | 1.04                             |
| Average  | 1.02                             |
| S.D.     | 0.07                             |

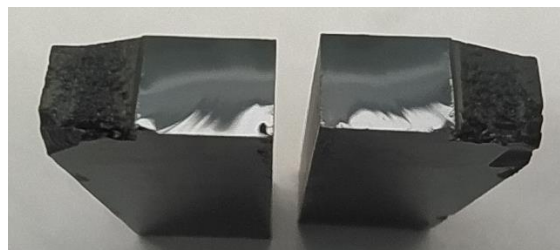

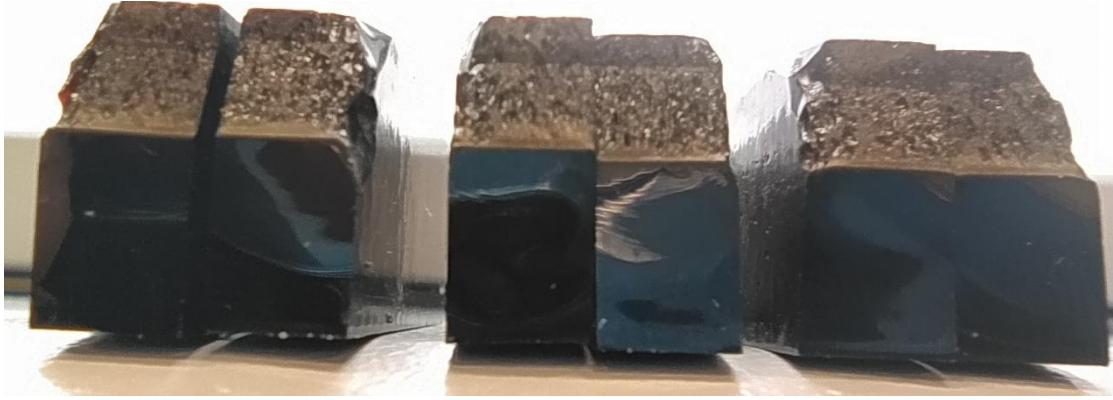

**Figure S6.** Fractured surfaces of tested aero grade epoxy vitrimer.

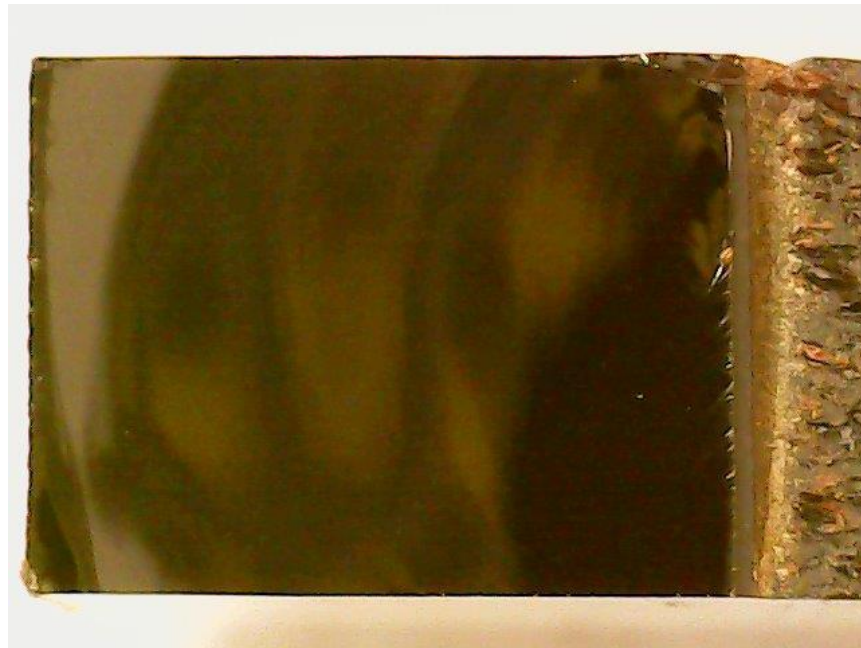

**Figure S7.** Detailed fracture surface analysis after failure. Smooth fracture surface.

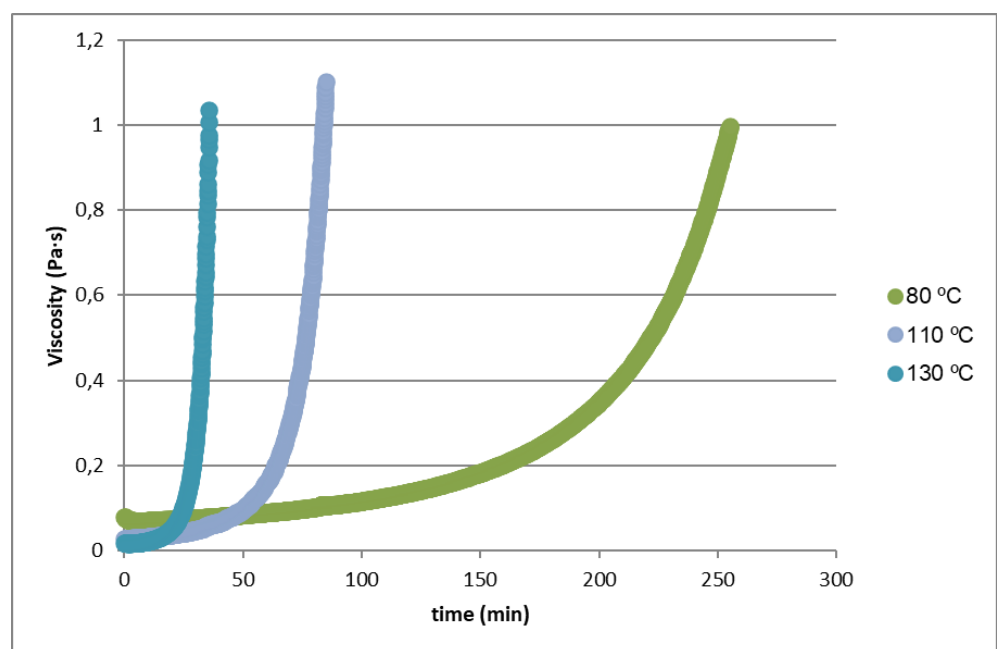

**Figure S8.** Viscosity evolution of aero grade epoxy resin at 80 °C, 110 °C and 130 °C.

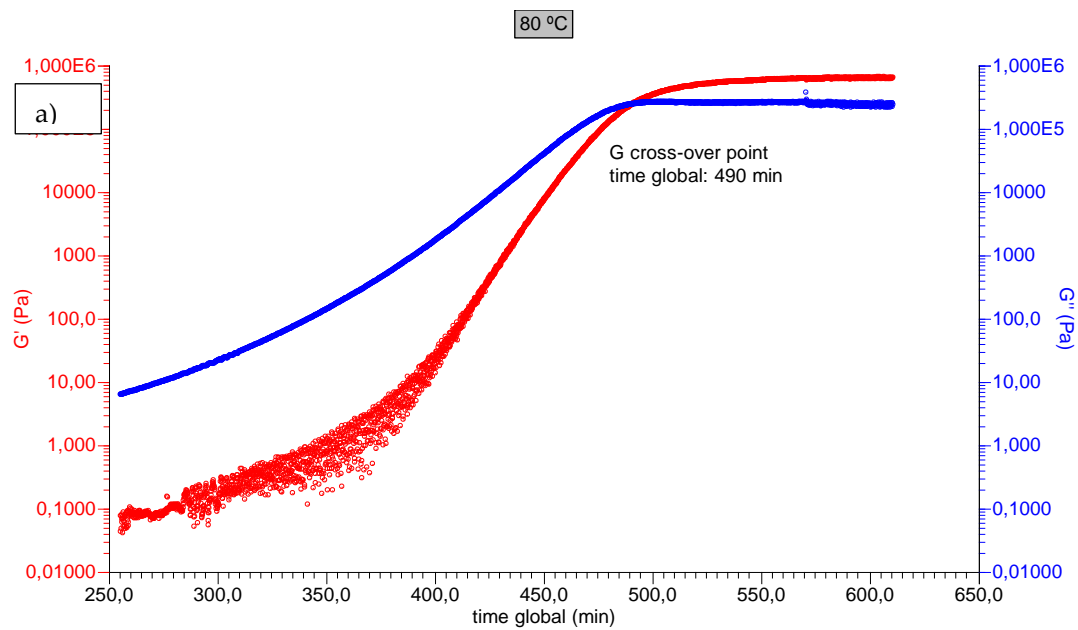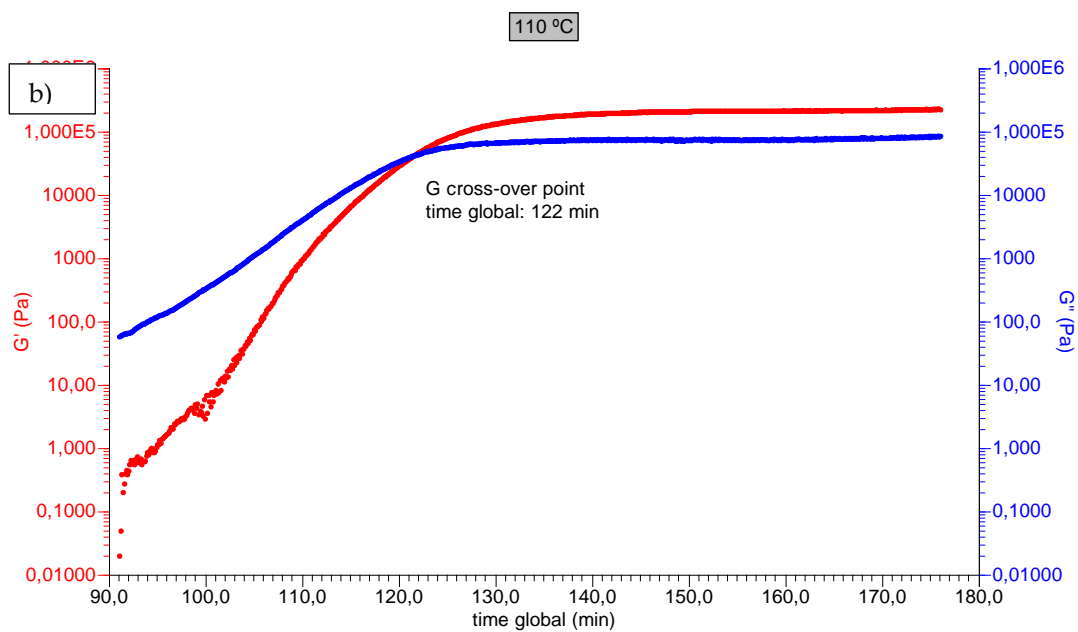

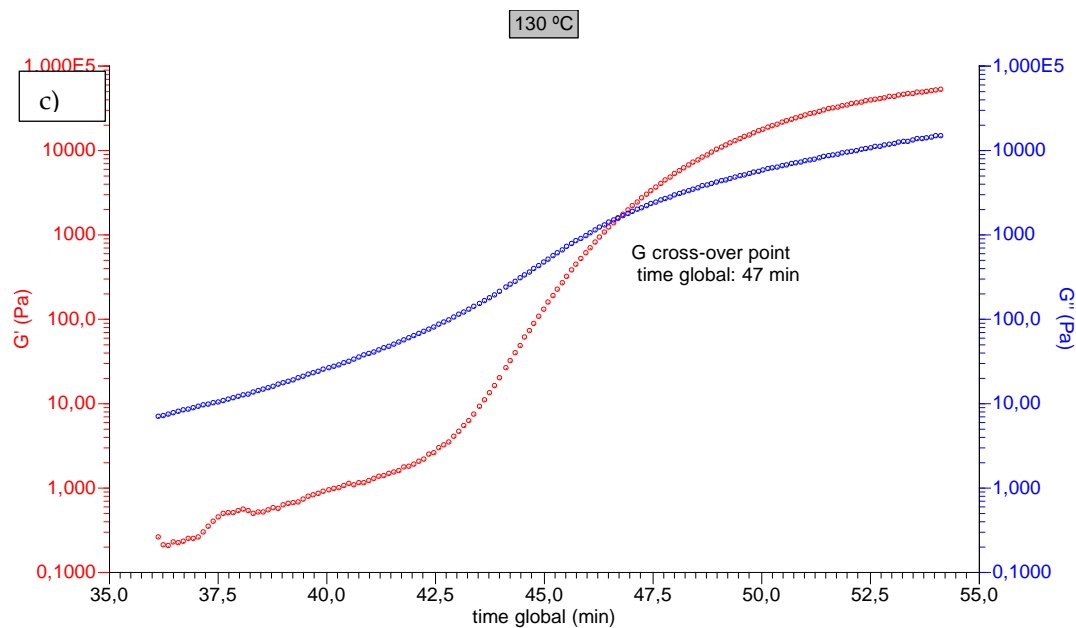

**Figure S9.** Gel point at 80 °C (a), 110 °C and 130 °C determined as the crossover point  $G' = G''$ .

**Table S2.** Enthalpy of cure, Tg of un-cured resin, onset curing temperature and exothermic temperature of aero grade epoxy vitrimer and reference RTM6 resin.

| Standard DSC parameters   |                      |                  |                |             |              |
|---------------------------|----------------------|------------------|----------------|-------------|--------------|
| Reference                 | Curing Ramp (°C/min) | Tg midpoint (°C) | Entalphy (J/g) | T peak (°C) | T onset (°C) |
| Aero grade epoxy vitrimer | 2.5                  | -19              | 529            | 159         | 131          |
| RTM6                      | 2.5                  | -18              | 534            | 201         | 178          |

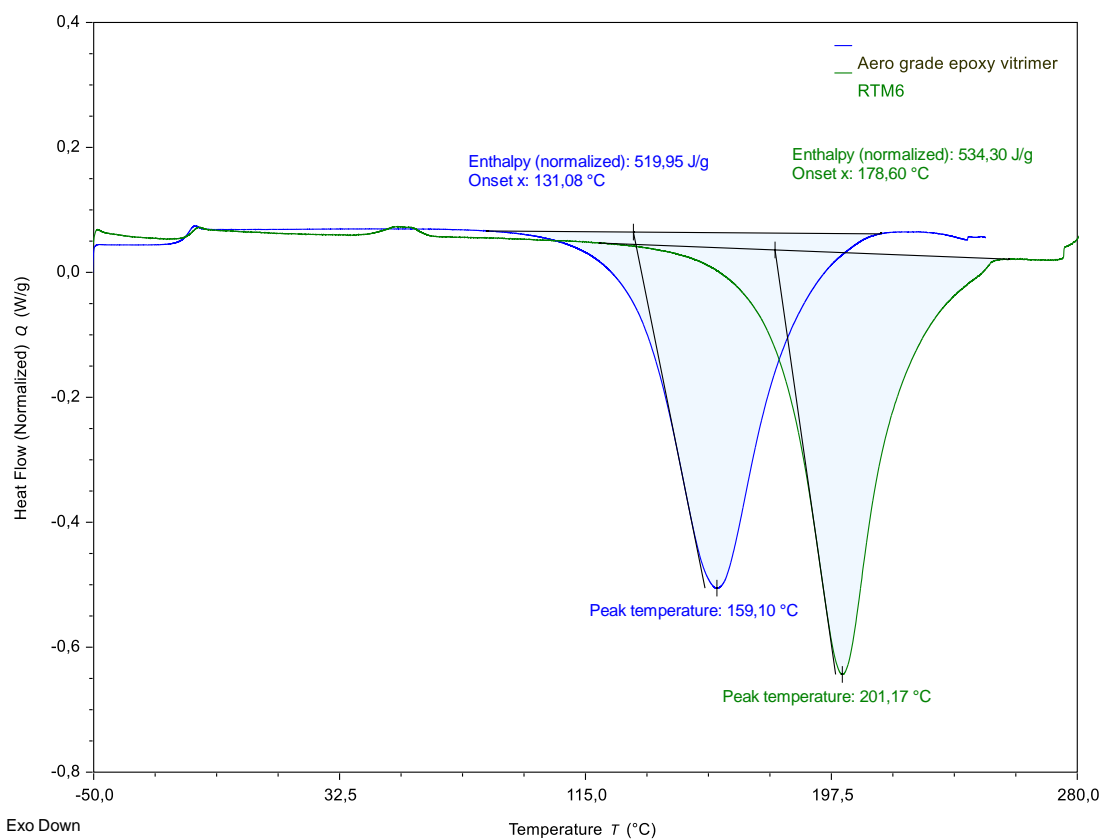

**Figure S10.** Dynamic DSC curves obtained at 2.5 °C/min for aero grade epoxy vitrimer (blue) and reference RTM6 resin (green).

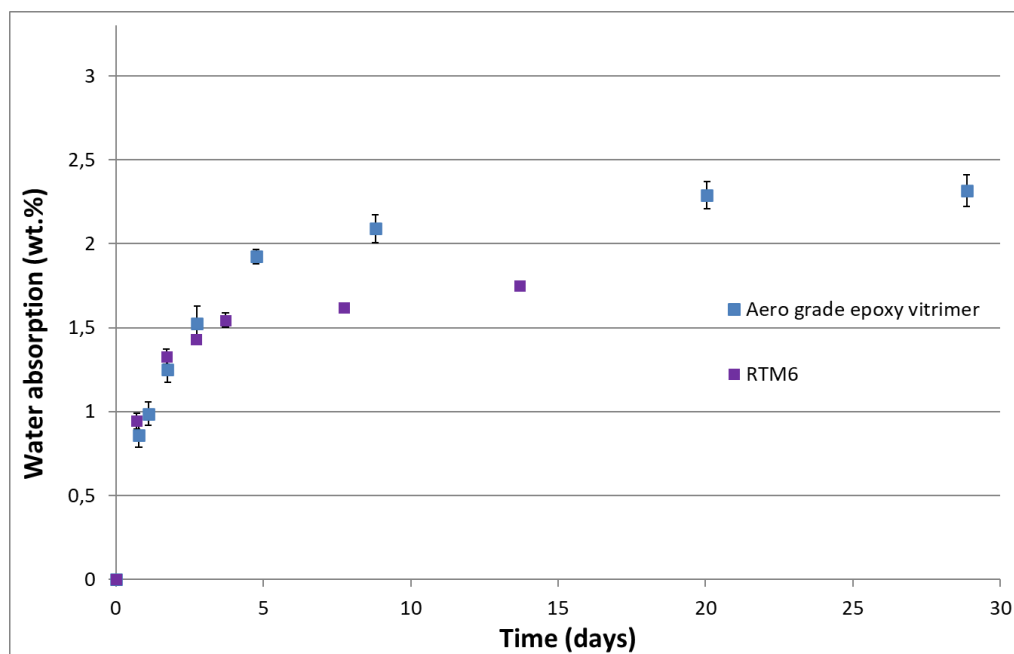

**Figure 11.** Water uptake of aero grade epoxy vitrimer.

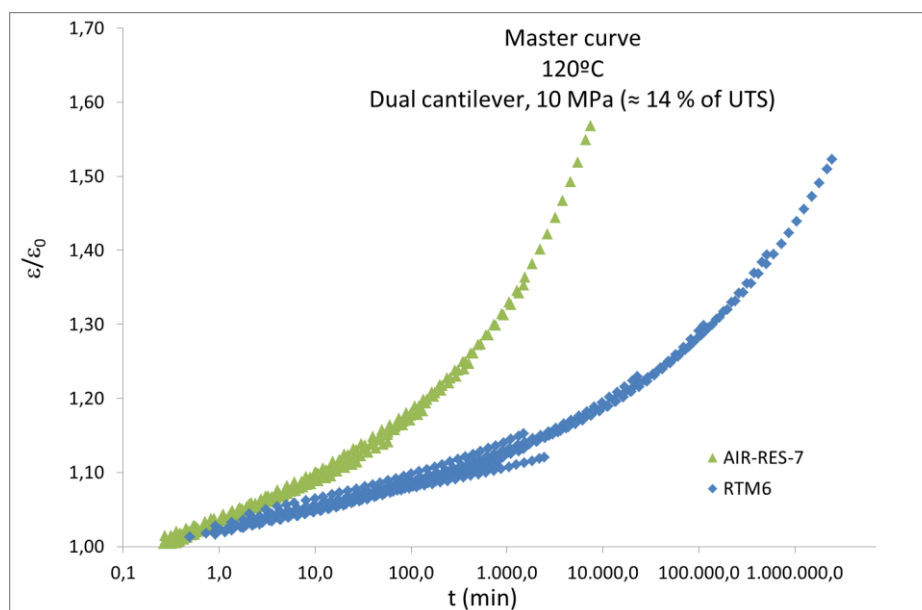

**Figure S12.** Creep strain master curve at 120 °C obtained by horizontal shifting of creep data at different temperatures.

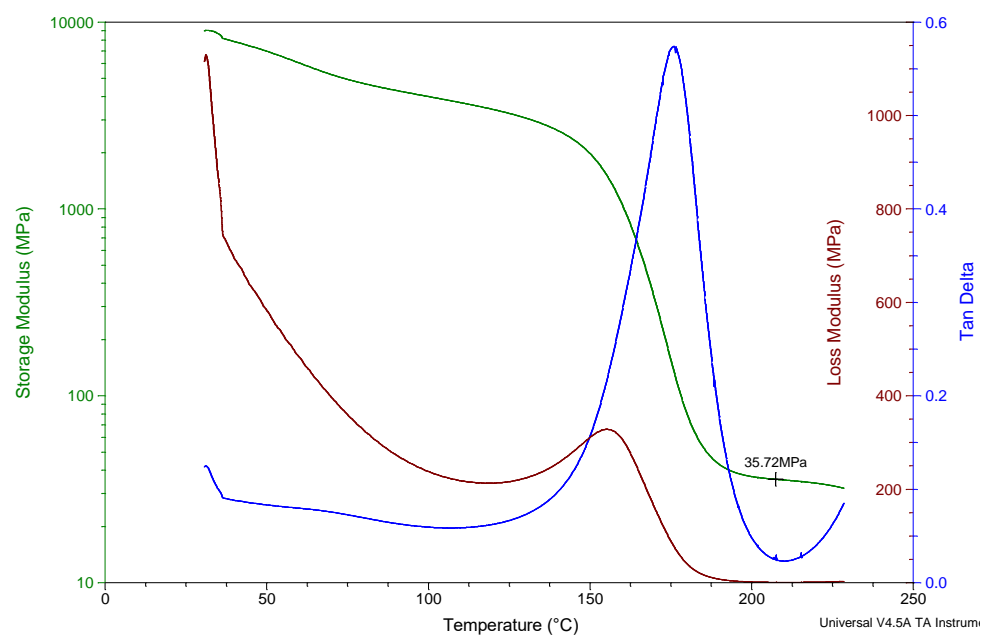

**Figure S13.** DMA curve obtained for thermoformed epoxy vitrimer, representing storage modulus, loss modulus and tan delta versus temperature.  $T_g = 175\text{ }^{\circ}\text{C}$  was determined from the maximum of tan delta.

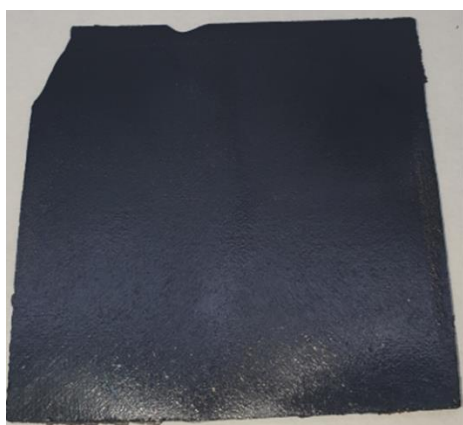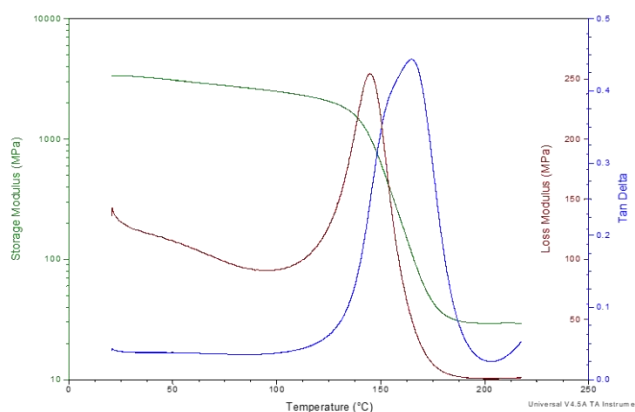

**Figure S14.** (Left) reprocessed aero grade epoxy vitrimer. (Right) DMA plot of reprocessed aero grade epoxy vitrimer.
